# Supplementary material for: Supramolecular structures and spontaneous resolution: the case of ortho-substituted phenylboronic acids
Source: Royal Society of Chemistry journal article supplement (doi:10.1039/b719282g), 2008-01-01
Supplement: b719282g.pdf [file b719282g.pdf]

## Supporting Information:

### Supramolecular structures and spontaneous resolution: the case of *ortho* substituted phenylboronic acids

Matthias Filthaus,<sup>a</sup> Iris M. Oppel,<sup>b</sup> and Holger F. Bettinger<sup>a,\*</sup>

<sup>a</sup> *Organische Chemie II, Ruhr-Universität Bochum, Universitätsstr. 150, 44780 Bochum,  
Germany*

<sup>b</sup> *Analytische Chemie, Ruhr-Universität Bochum, 44780 Bochum, Germany*

*e-Mail: Holger.Bettinger@rub.de*

*Fax: Int +234/322-4529*

## Displacement Ellipsoids for Novel Crystal Structures

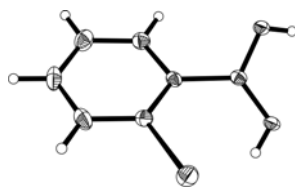

Figure S1. 50% ellipsoids for compound **7**.

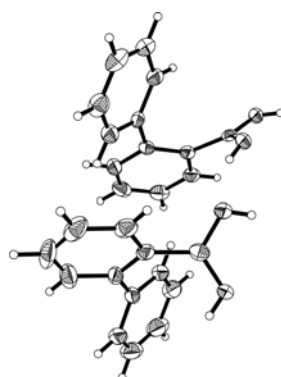

Figure S2. 50% ellipsoids for compound **8**.

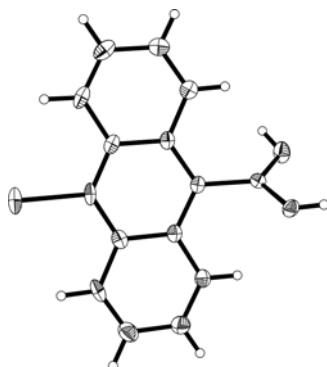

Figure S3. 50% ellipsoids for compound **10b**.

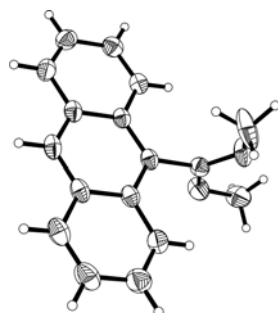

Figure S4. 30% ellipsoids for compound **11a**.

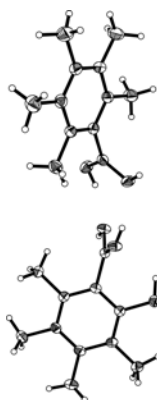

Figure S5. 50% ellipsoids for compound **9**.
